# Supplementary figures and images for: Physical Fitness, Exercise Self-Efficacy, and Quality of Life in Adulthood: A Systematic Review.
Source: Preprints.org preprint supplement (doi:10.20944/preprints202007.0700.v1), 2020-07-29

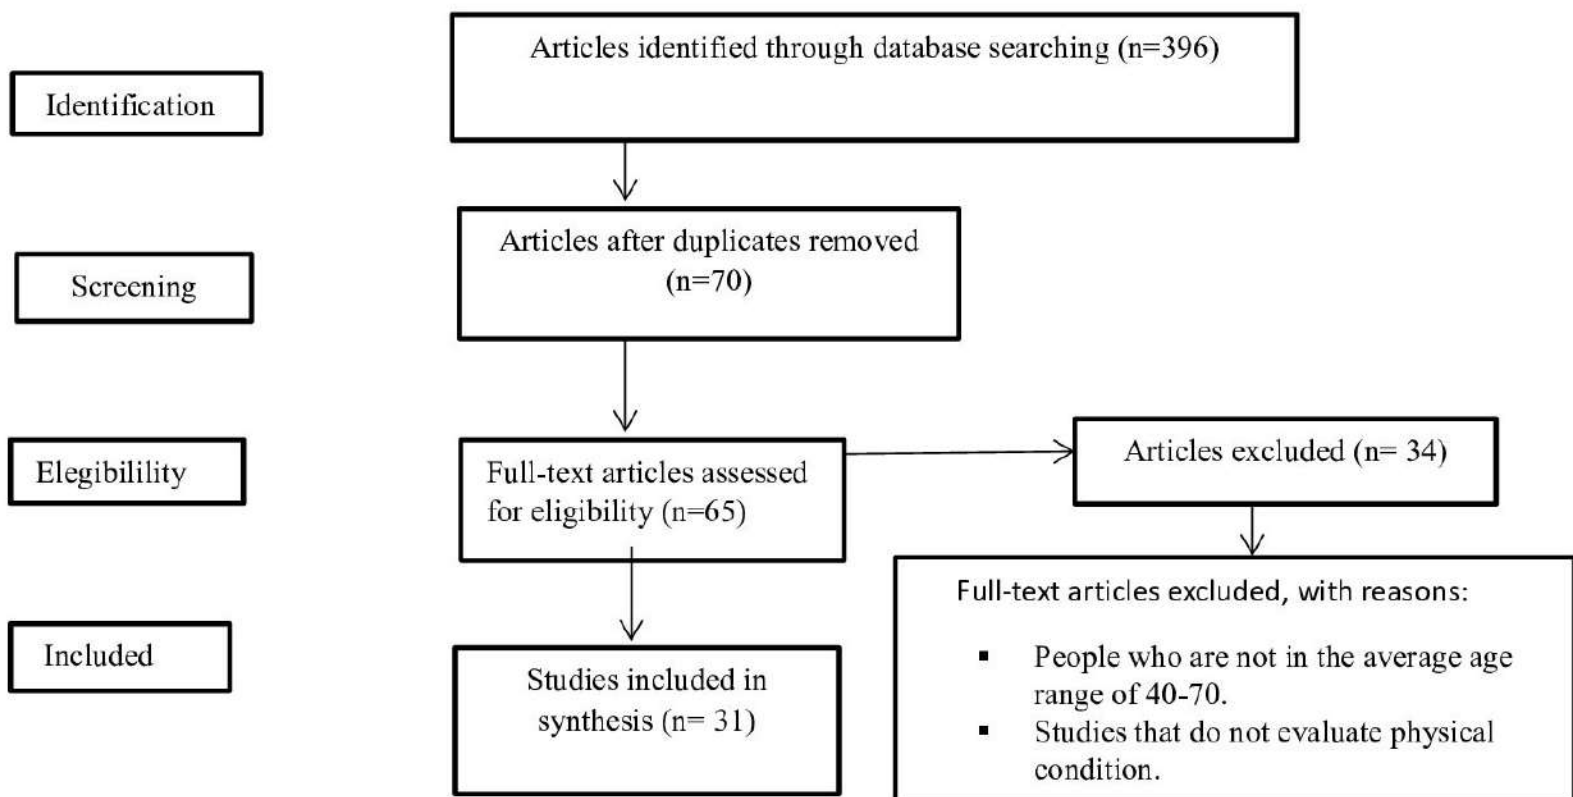

Supplement: Supplementary file 3 [file supplementary]
